# Supplementary material for: A sonochemical approach for the synthesis of thermally stable mesoporous microspheres of TiO2 for use as high performance anodes for Li-ion batteries
Source: Royal Society of Chemistry journal article supplement (doi:10.1039/c6nj00470a), 2016-01-01
Supplement: c6nj00470a1.pdf [file c6nj00470a1.pdf]

### **Supplementary Information**

#### **A Sonochemical approach for the synthesis of thermally stable mesoporous microspheres of TiO<sub>2</sub> for use as high performance anode for Li-ion batteries**

Satyendar Sunkara<sup>a</sup>, N. Munichandraiah<sup>b</sup>, K.B.R. Varma<sup>a</sup>, S.A. Shivashankar<sup>a,c</sup>

<sup>a</sup>Materials Research Centre, <sup>b</sup>Department of Inorganic and Physical Chemistry, <sup>c</sup>Centre for Nano Science and Engineering, Indian Institute of Science, Bengaluru-560012, India

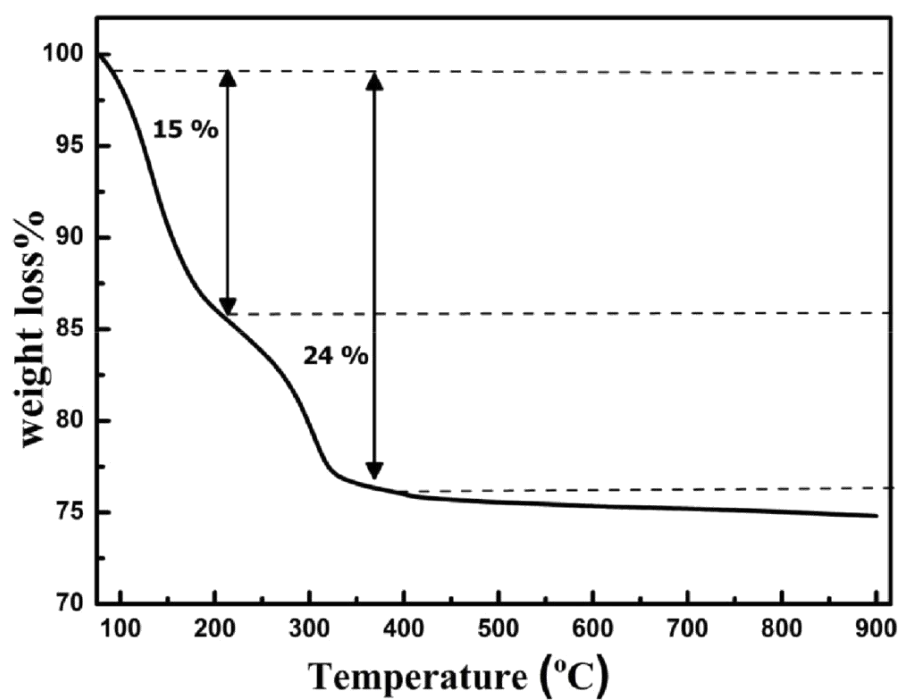

Fig. S1 Thermogravimetric analysis curve of as prepared powder.

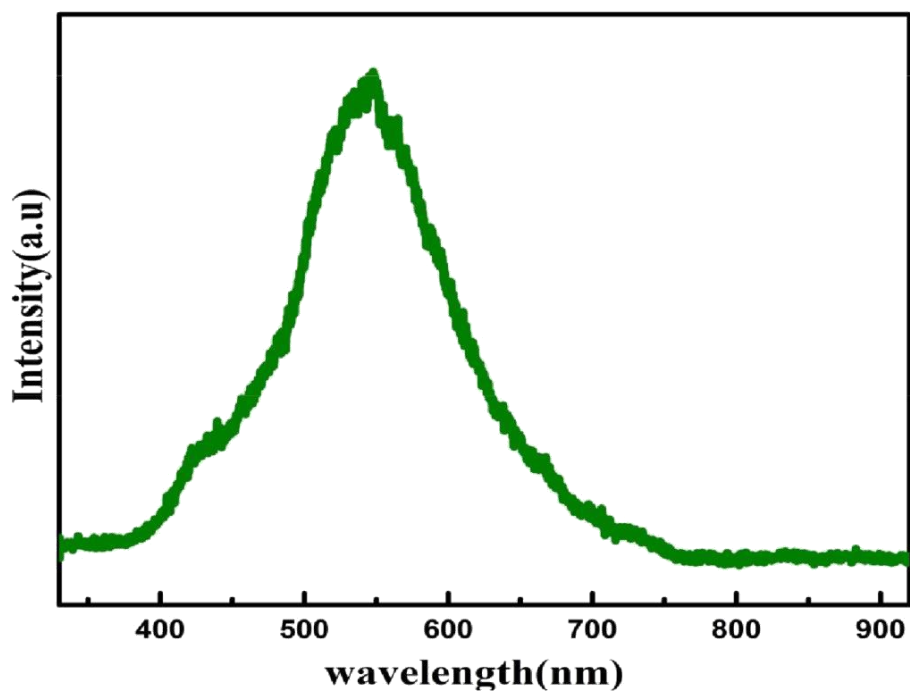

Fig. S2 Photoluminescence spectrum of anatase TiO<sub>2</sub> microspheres

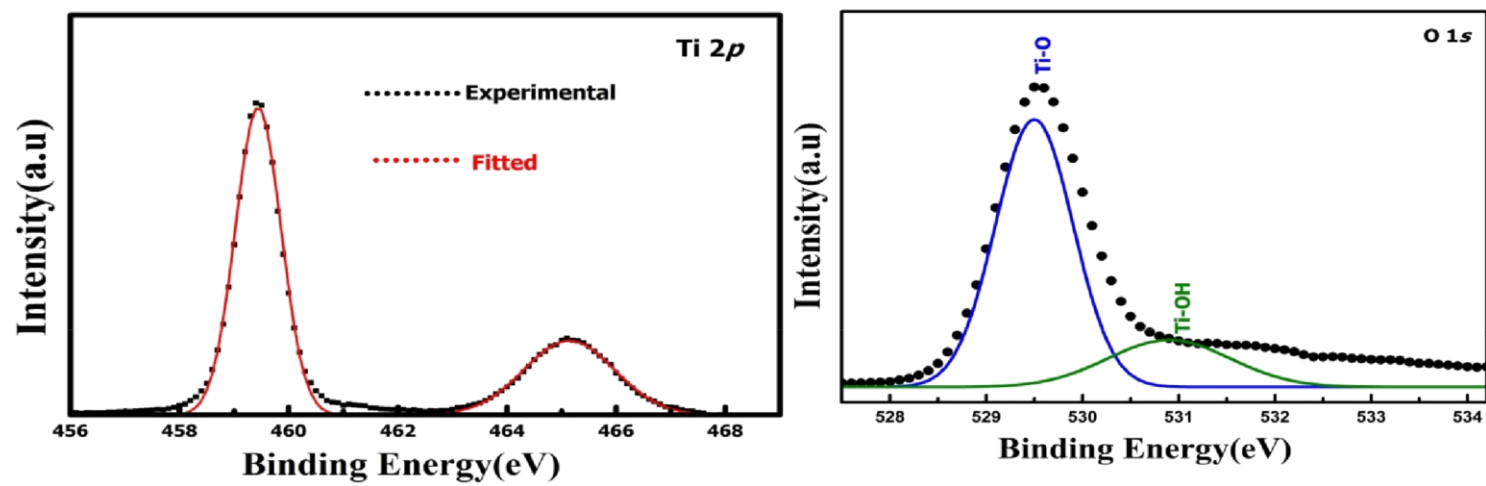

Fig. S3 XPS core level spectra Ti and O 1s
